# Supplementary figures and images for: Whole-genome and multisector exome sequencing of primary and post-treatment glioblastoma reveals patterns of tumor evolution
Source: PubMed Central journal article supplement — Genome Res. 2015 Mar;25(3):316–27. doi: 10.1101/gr.180612.114 (PMC4352879; doi:10.1101/gr.180612.114), 2015-03

A.

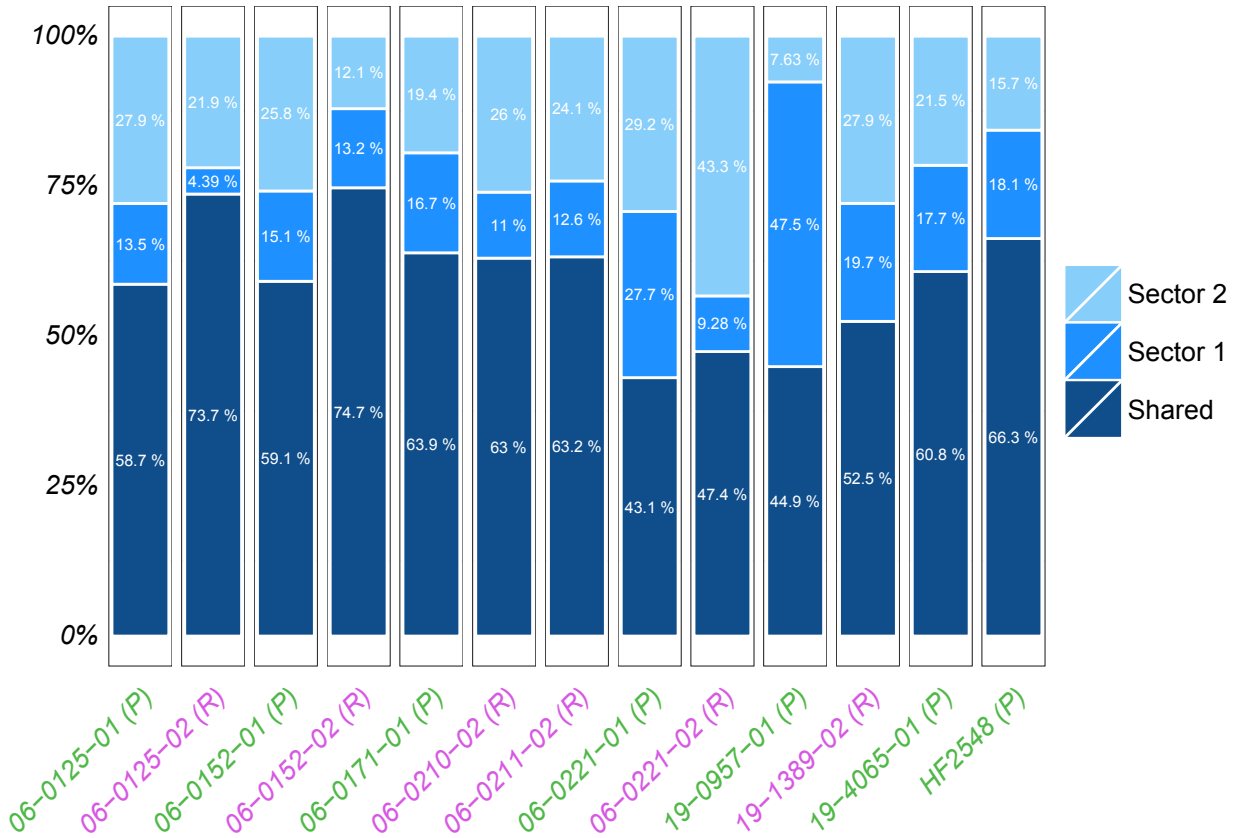

B.

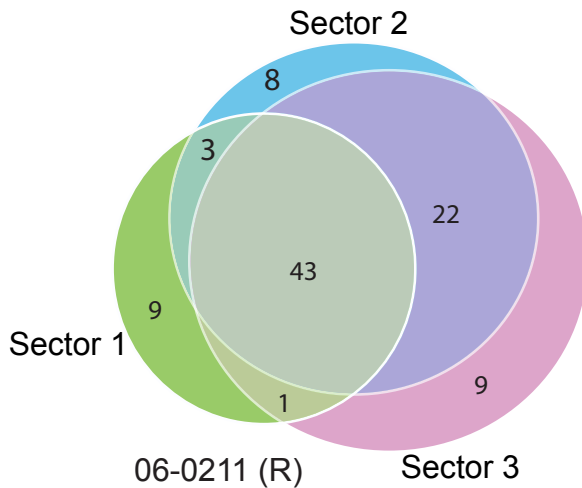

A.

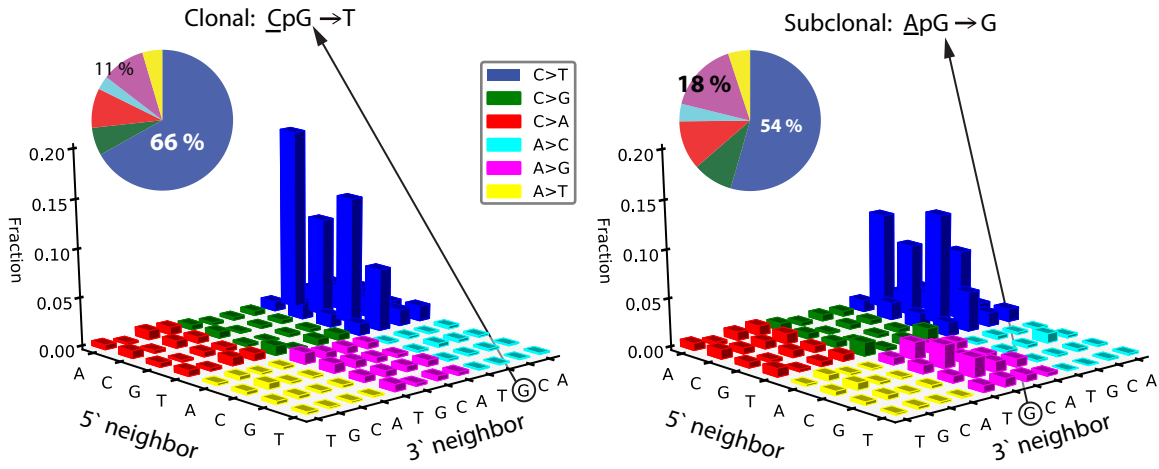

B.

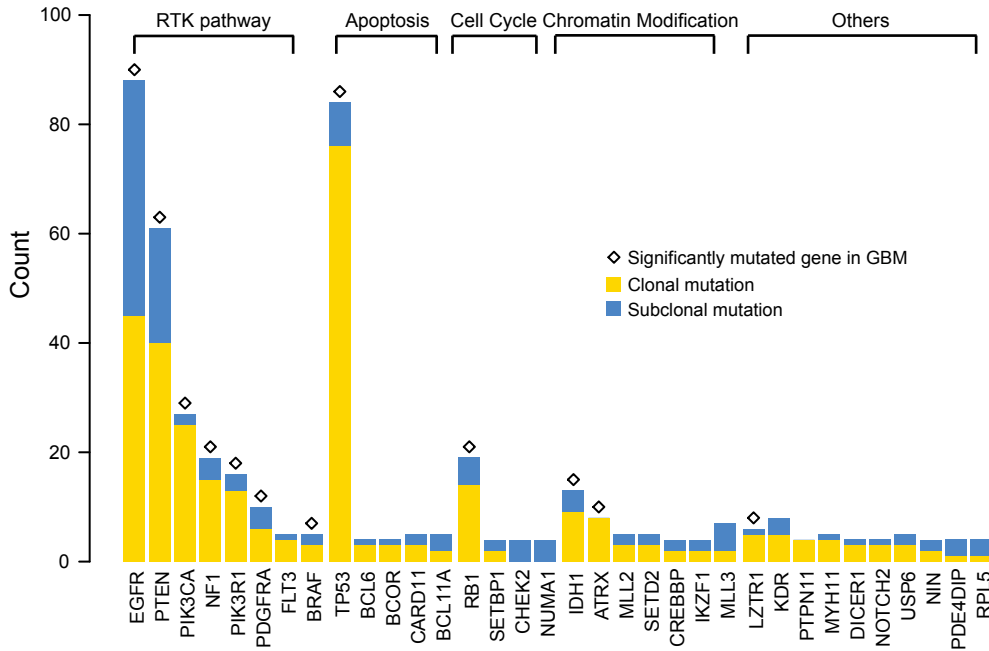

## Top 30%, EFS

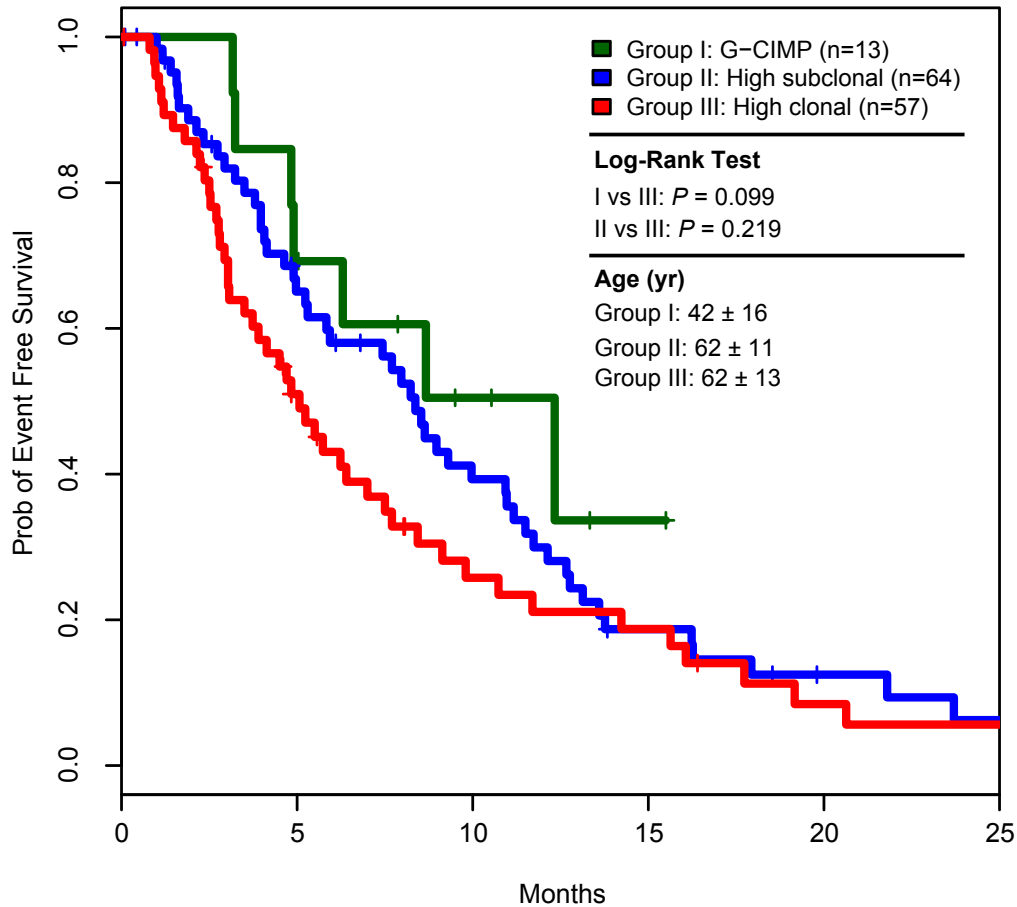

Supplementary Fig. 4

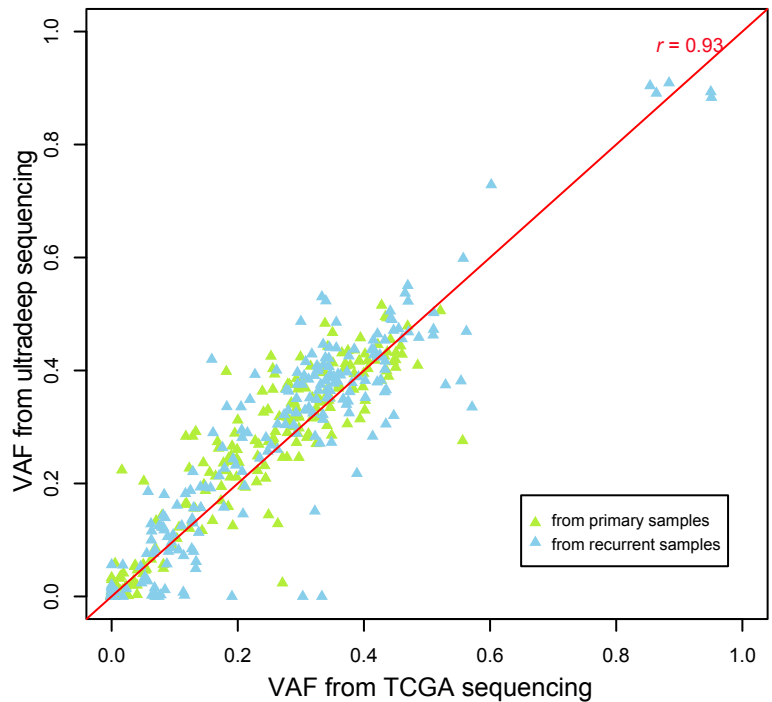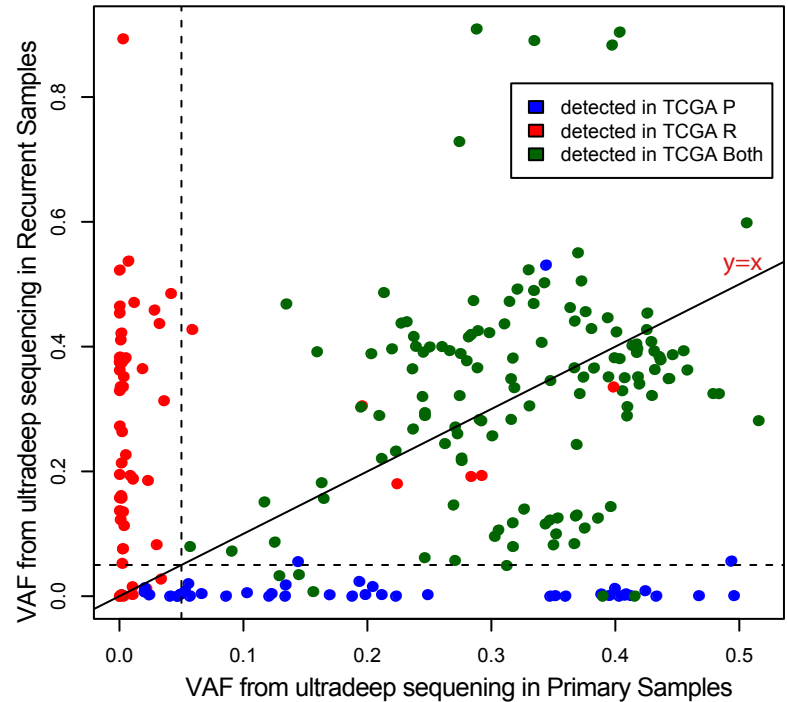

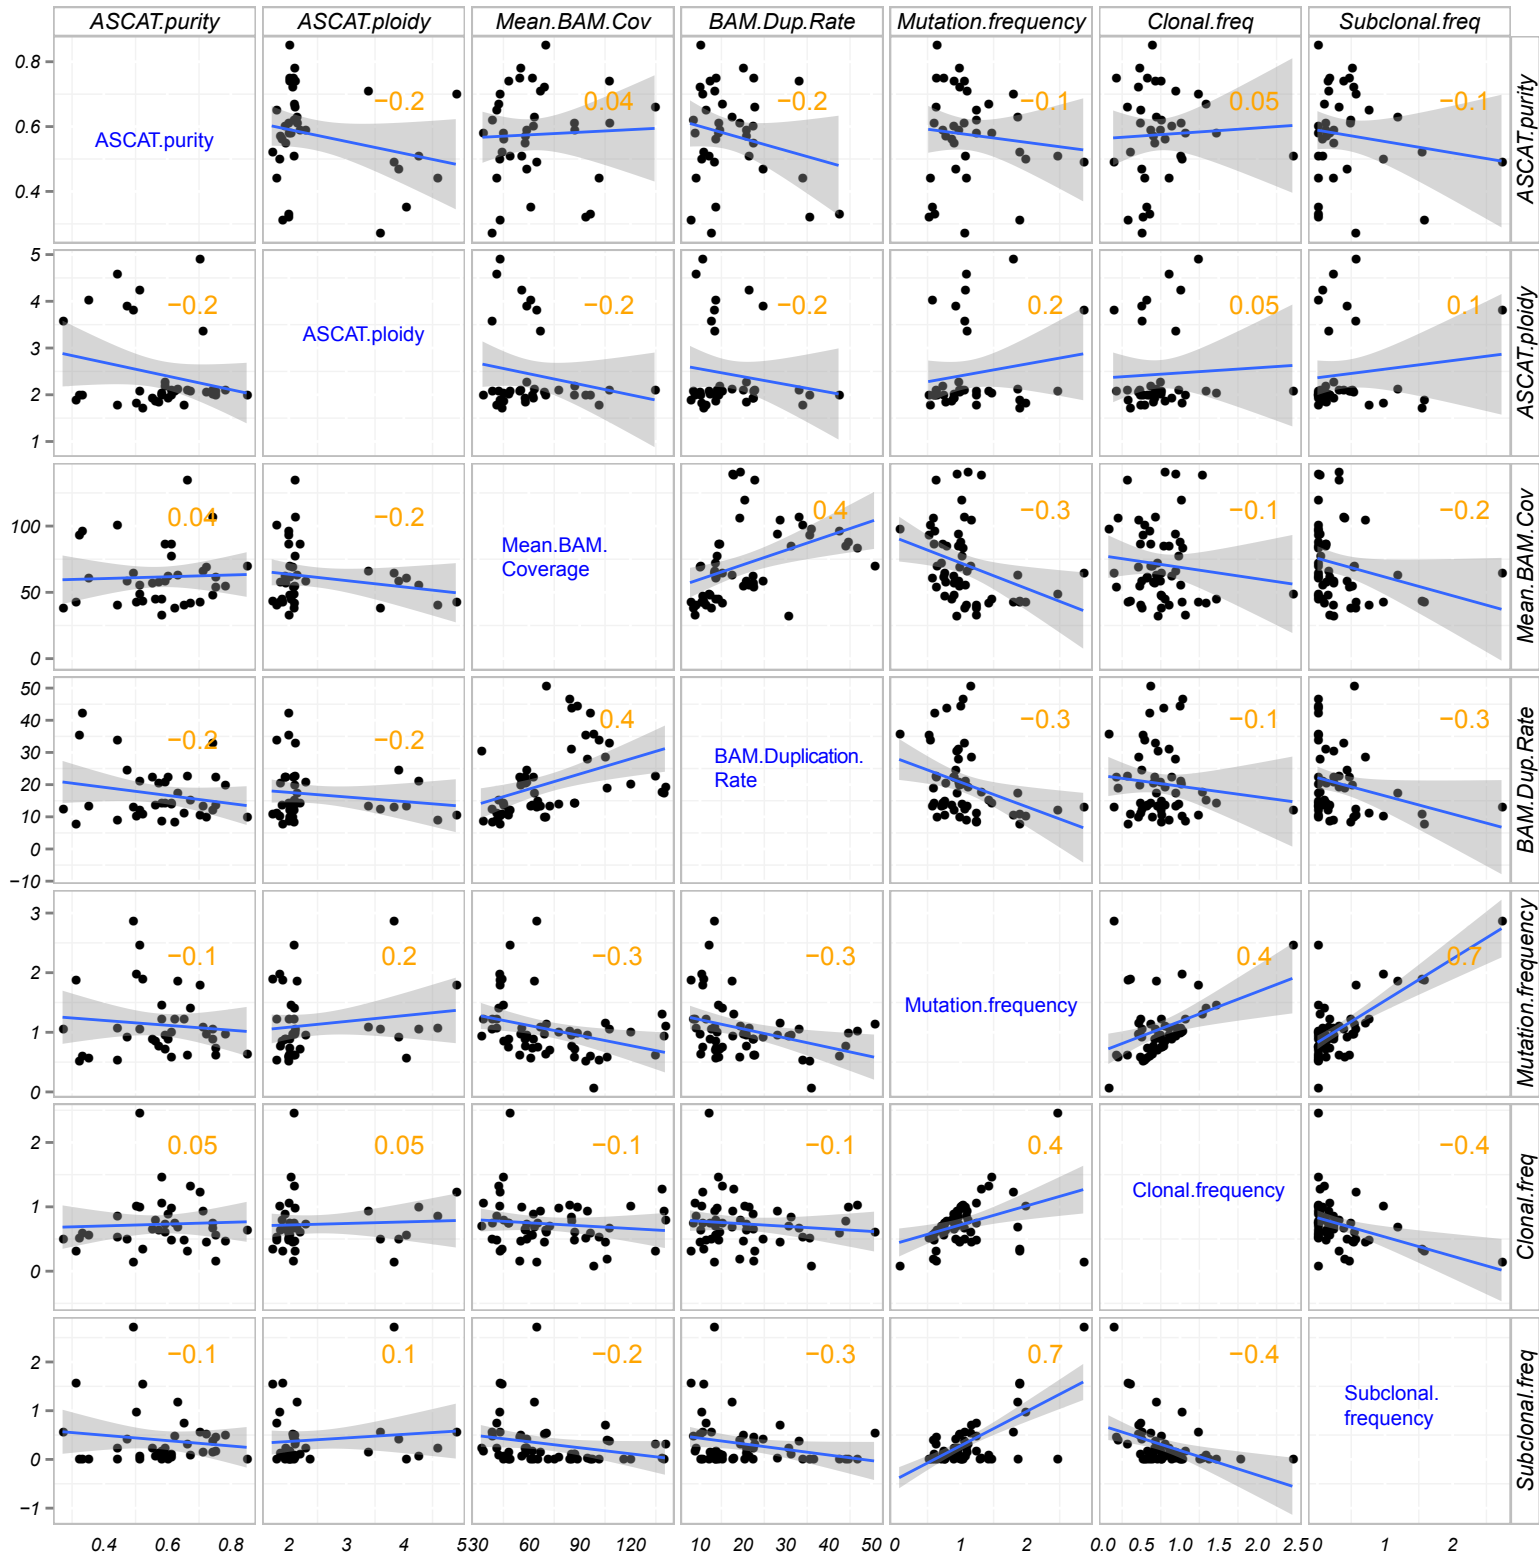

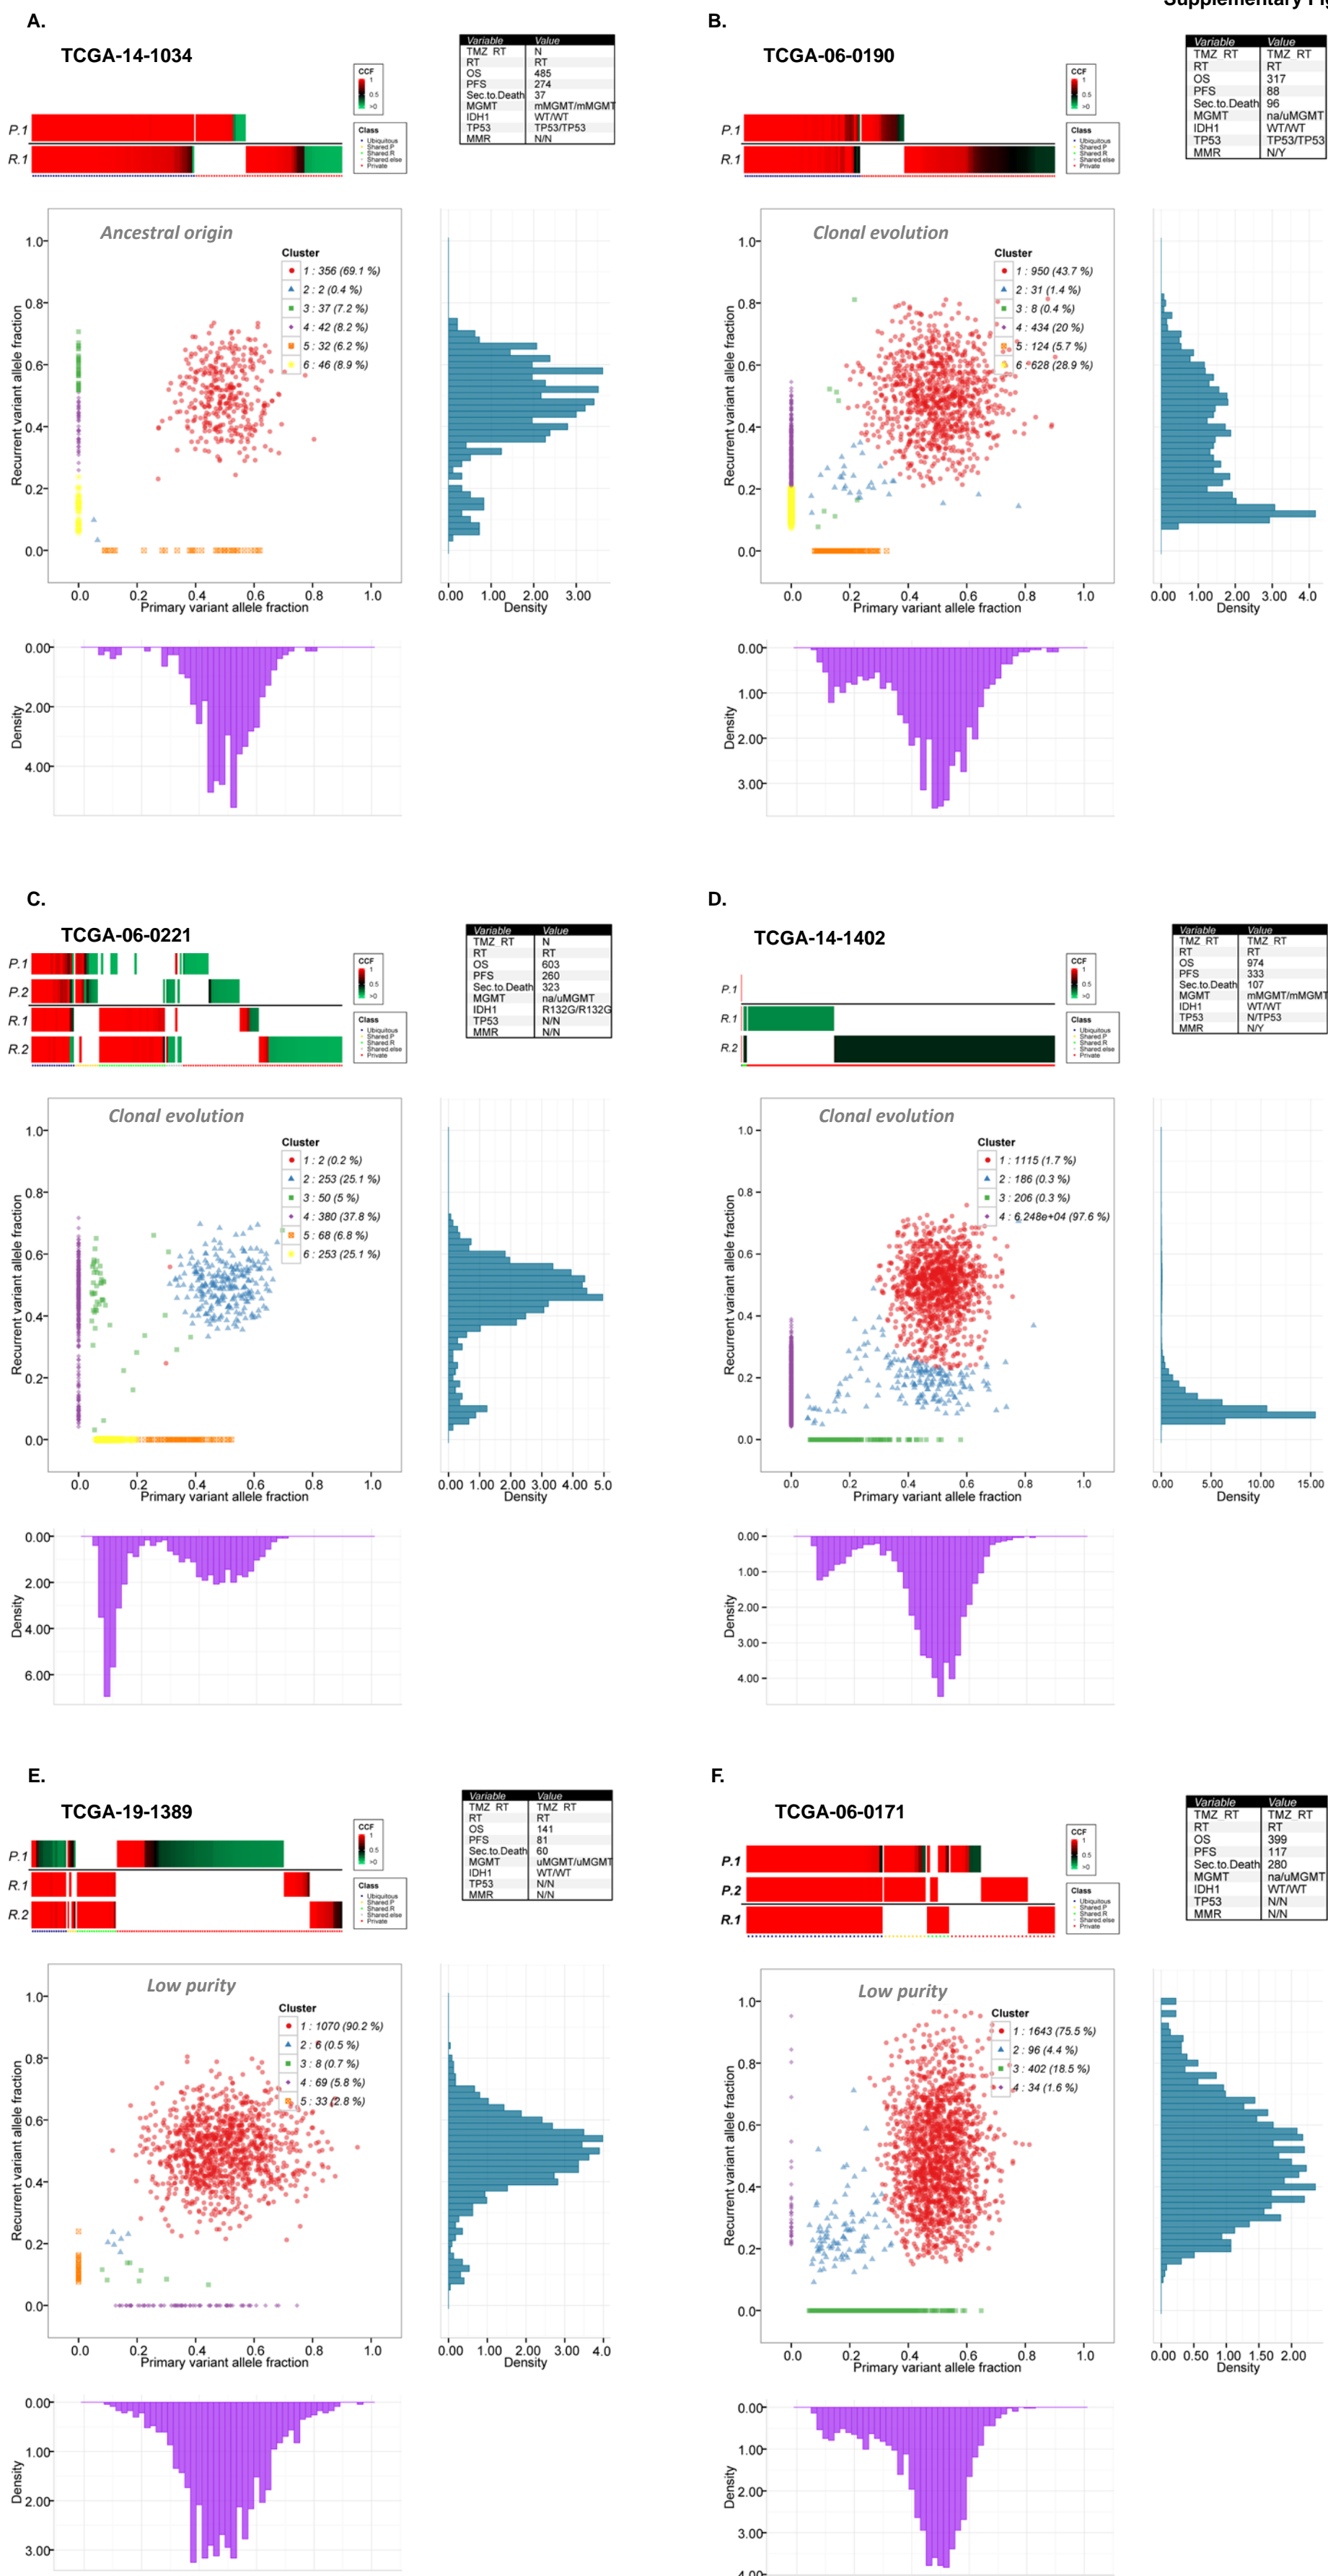

Supplement: supp_gr.180612.114_Supplemental_Figures.pdf [file supp_gr.180612.114_Supplemental_Figures.pdf]
